# Supplementary material for: Fabrication of a hybrid phase TiO2/g-C3N4 heterojunction composite with enhanced adsorption and photocatalytic degradation of MB under visible light
Source: Royal Society of Chemistry journal article supplement (doi:10.1039/d3nj00926b), 2023-01-01
Supplement: d3nj00926b1.pdf [file d3nj00926b1.pdf]

**New Journal of Chemistry**

**Supporting Information**

**Fabrication of hybrid phase TiO<sub>2</sub>/g-C<sub>3</sub>N<sub>4</sub> heterojunction  
composite with enhanced adsorption and photocatalytic  
degradation of MB under visible light**

Shuanghui Liu<sup>ac</sup>, Changle Wang<sup>a</sup>, Yao Song<sup>a</sup>, Binglin Yan<sup>c</sup>, Bing Ai<sup>a</sup>, Kefeng Pan<sup>\*ac</sup>,  
Lipeng Zhang<sup>\*ab</sup>

<sup>a</sup> School of Chemistry and Chemical Engineering, Shandong University of Technology,  
Zibo, 255049, China. Telephone: +86 13070639976 (K. Pan). E-mail:  
Kefeng\_Pan@sdut.edu.cn (K. Pan)

<sup>b</sup> School of Materials and New Energy, South China Normal University, Shanwei 516600,  
China. Telephone: +86 18253376831 (L. Zhang). E-mail: zhanglipeng@sdut.edu.cn (L.  
Zhang)

<sup>c</sup> SHANDONG HAIPUOU environmental protection equipment Technology Co., Ltd,  
Weifang 262200, China. Telephone: +86 18853631118 (B. Yan). E-mail:  
haipuou@163.com(B. Yan)

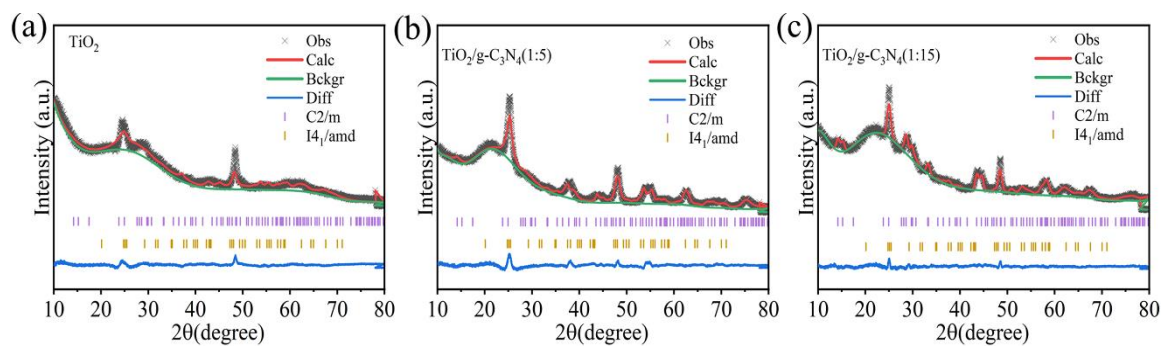

Fig. S1. Rietveld refinement of (a)  $\text{TiO}_2$ , (b)  $\text{TiO}_2/\text{g-C}_3\text{N}_4(1:5)$  and (c)  $\text{TiO}_2/\text{g-C}_3\text{N}_4(1:15)$  composite.

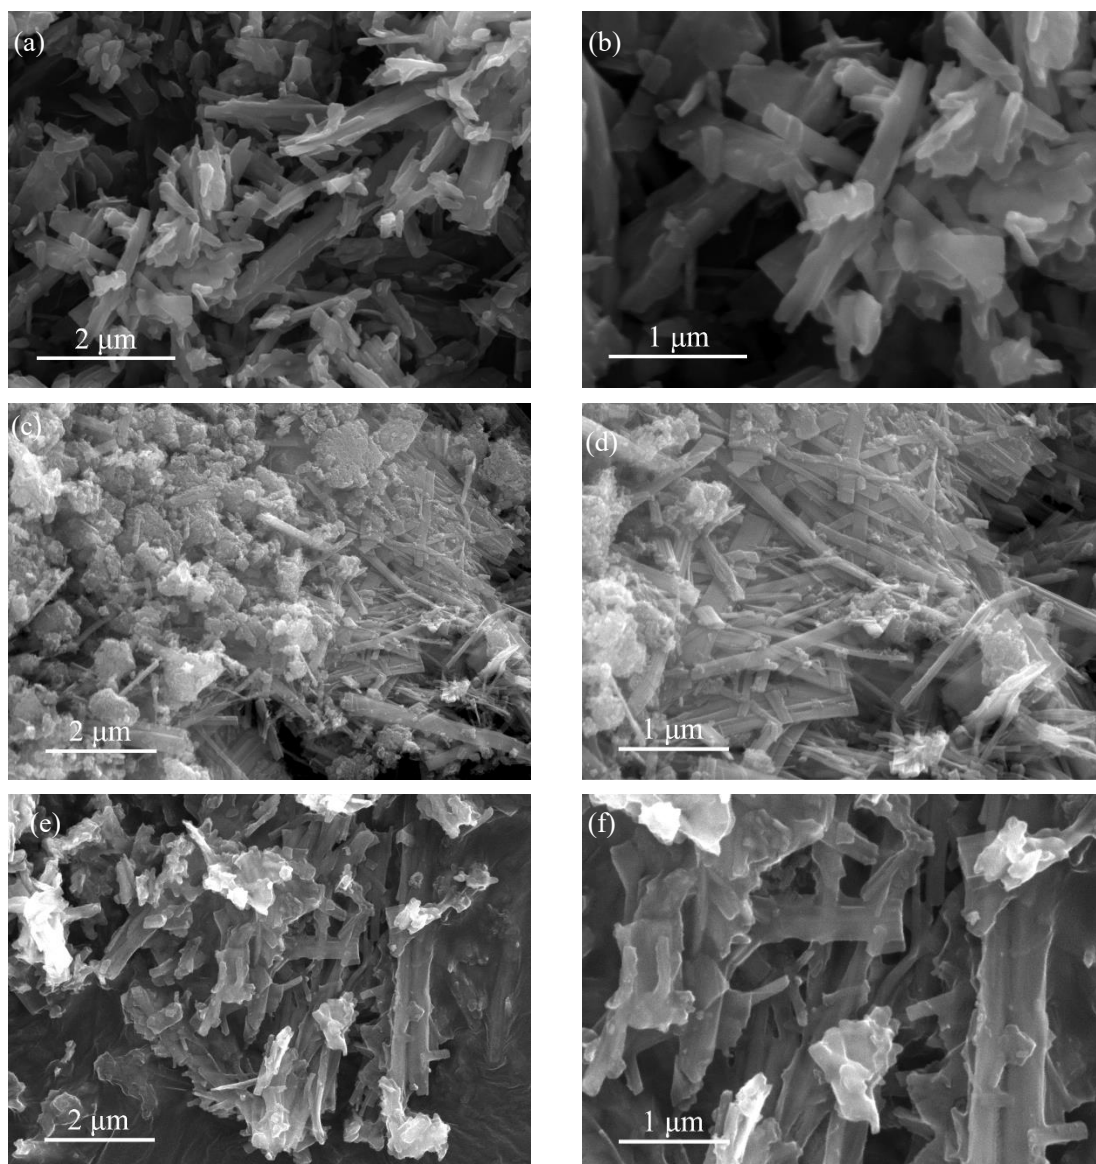

Fig. S2 SEM of (a, b)  $\text{TiO}_2$ , (c, d)  $\text{TiO}_2/\text{g-C}_3\text{N}_4(1:5)$ , (e, f)  $\text{TiO}_2/\text{g-C}_3\text{N}_4(1:15)$ .

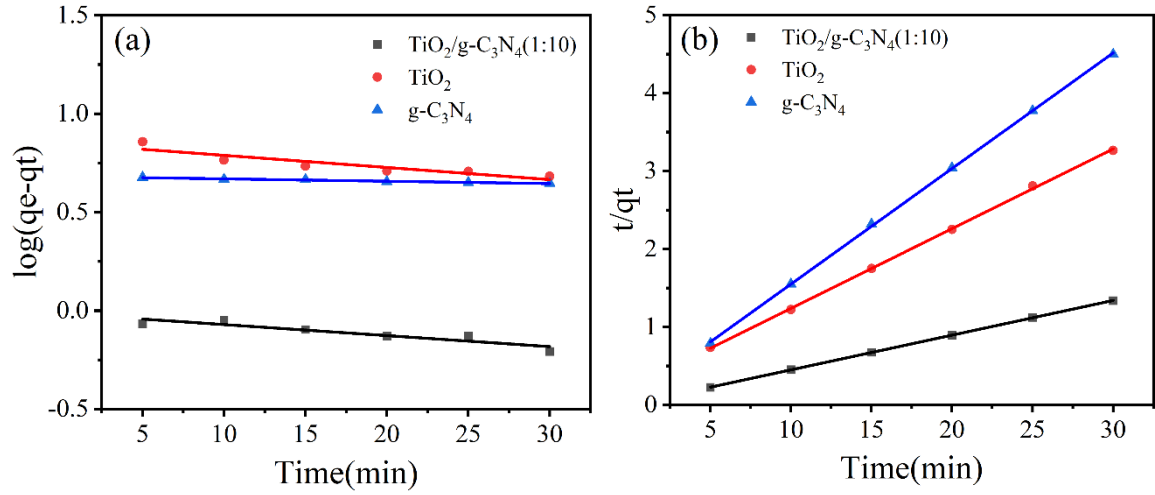

Fig. S3. (a) Pseudo-first order kinetics plot, (b) pseudo-second order kinetics plot for the adsorption of MB onto  $\text{TiO}_2/\text{g-C}_3\text{N}_4(1:10)$ .

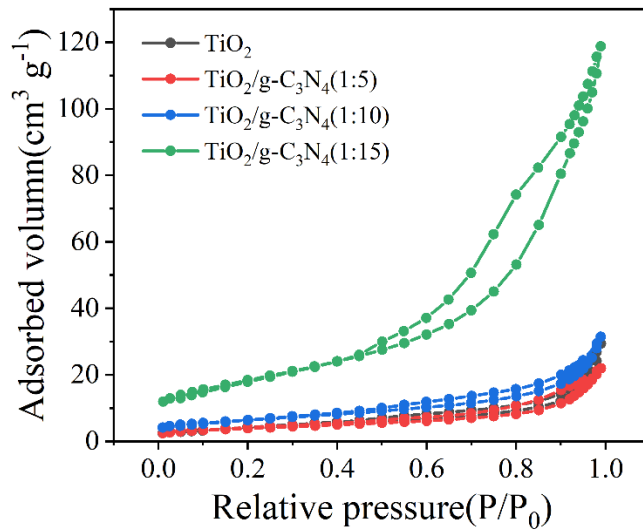

Fig. S4.  $\text{N}_2$  adsorption-desorption isotherms of  $\text{TiO}_2$ ,  $\text{TiO}_2/\text{g-C}_3\text{N}_4(1:5)$ ,  $\text{TiO}_2/\text{g-C}_3\text{N}_4(1:10)$ ,  $\text{TiO}_2/\text{g-C}_3\text{N}_4(1:15)$ .

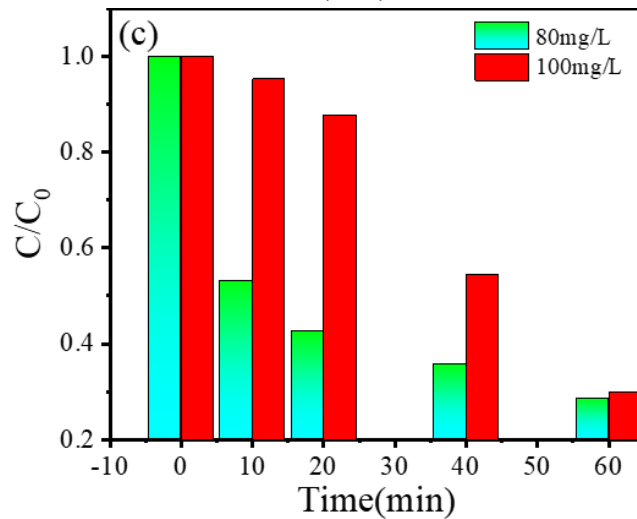

Fig. S5. The photodegradation performance of  $\text{TiO}_2/\text{g-C}_3\text{N}_4(1:10)$ .

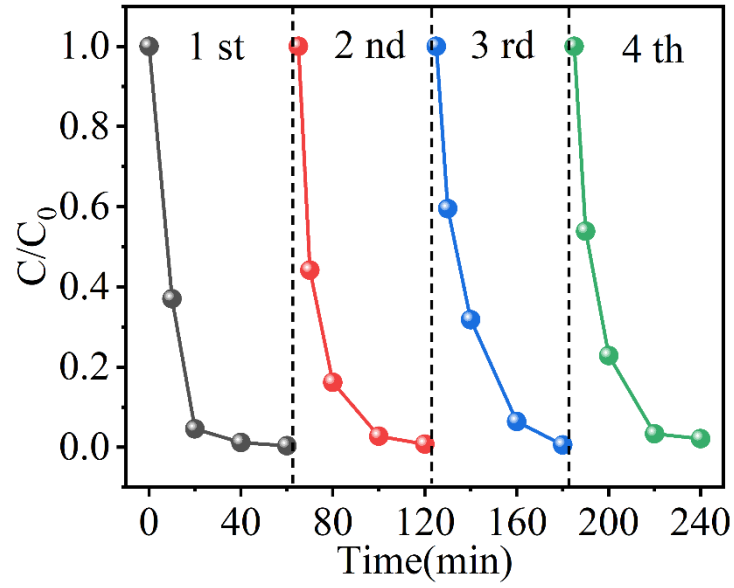

Fig. S6. Cycling experiments of MB degradation by  $\text{TiO}_2/\text{g-C}_3\text{N}_4(1:10)$  under visible light..

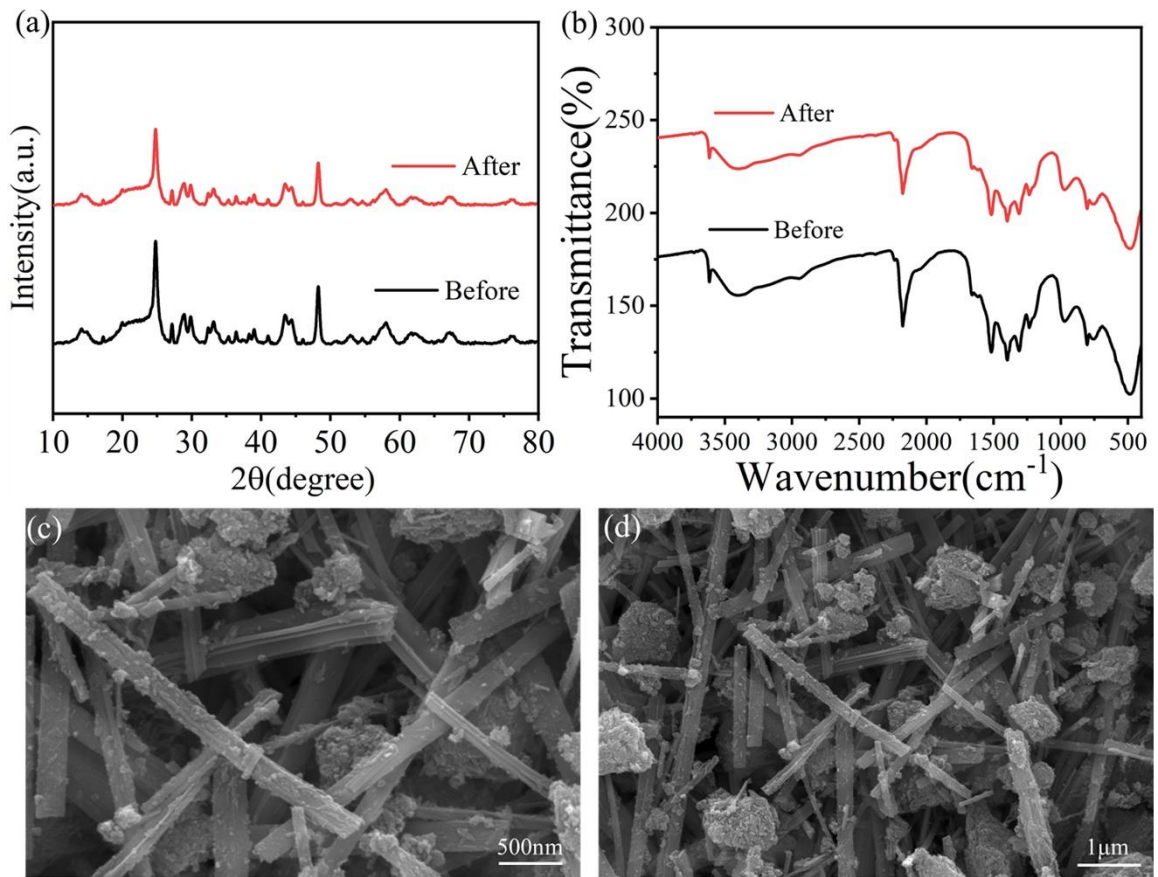

Fig. S7. XRD diffraction pattern (a), FT-IR spectra (b), SEM (c-pristine, d-used) of the  $\text{TiO}_2/\text{g-C}_3\text{N}_4(1:10)$  composite before and after photodegradation of MB.

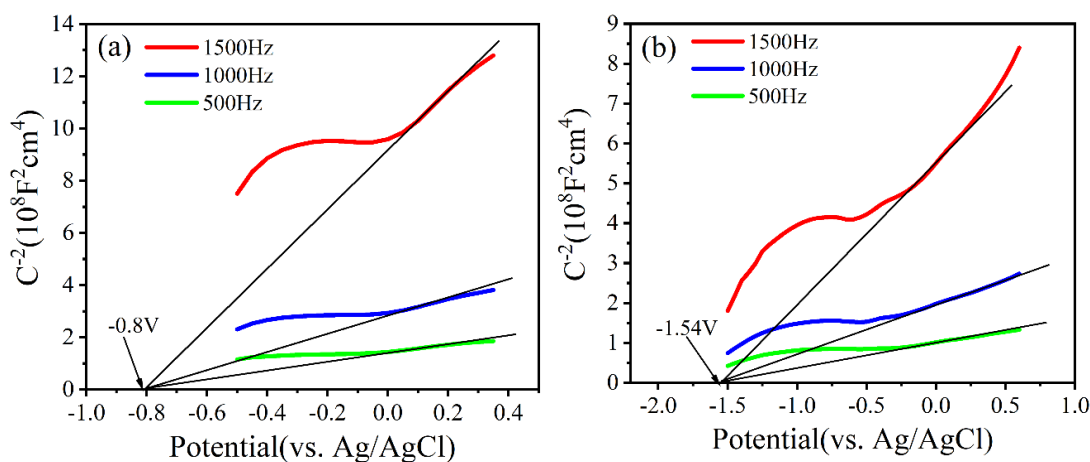

Fig. S8. Mott-Schottky plots of (a)TiO<sub>2</sub> and (b)g-C<sub>3</sub>N<sub>4</sub>.

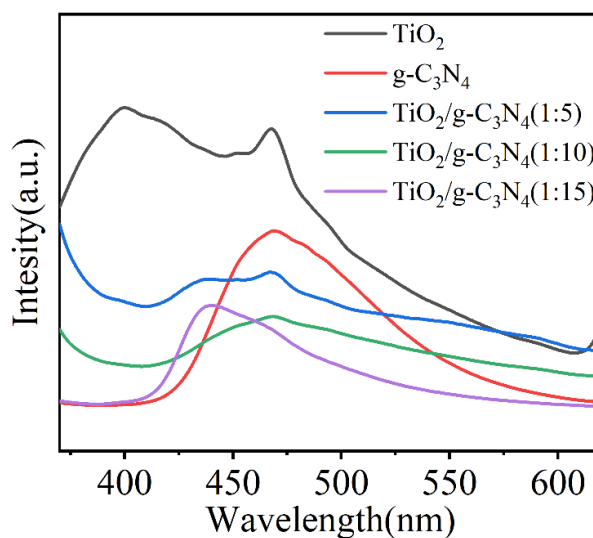

Fig. S9. Photoluminescence (PL) spectra of different samples.

Table S1 Microstructural parameters deduced from the Rietveld refinement analysis of the XRD patterns for the TiO<sub>2</sub> and TiO<sub>2</sub>/g-C<sub>3</sub>N<sub>4</sub> catalysts.

| Samples                                                  | Component (TiO <sub>2</sub> ) | Space Group          | Mass content/wt% | a/Å      | b/Å     | c/Å     | Rw/%  |
|----------------------------------------------------------|-------------------------------|----------------------|------------------|----------|---------|---------|-------|
| TiO <sub>2</sub>                                         | Brookite                      | C2/m                 | 74.0%            | 12.05    | 3.770   | 6.604   | 7.13  |
|                                                          | Anatase                       | I4 <sub>1</sub> /amd | 26.0%            | 3.78254  | 3.78254 | 9.61502 |       |
| TiO <sub>2</sub> /g-C <sub>3</sub> N <sub>4</sub> (1;5)  | Brookite                      | C2/m                 | 43.5%            | 12.10141 | 3.8099  | 6.5557  | 6.74  |
|                                                          | Anatase                       | I4 <sub>1</sub> /amd | 56.5%            | 3.78254  | 3.78254 | 9.61502 |       |
| TiO <sub>2</sub> /g-C <sub>3</sub> N <sub>4</sub> (1;10) | Brookite                      | C2/m                 | 93.6%            | 12.18    | 3.761   | 6.495   | 6.86  |
|                                                          | Anatase                       | I4 <sub>1</sub> /amd | 6.4%             | 3.78254  | 3.78254 | 9.61502 |       |
| TiO <sub>2</sub> /g-C <sub>3</sub> N <sub>4</sub> (1;15) | Brookite                      | C2/m                 | 91.9%            | 12.19409 | 3.75433 | 6.51884 | 4.538 |
|                                                          | Anatase                       | I4 <sub>1</sub> /amd | 8.1%             | 3.78254  | 3.78254 | 9.61502 |       |
